# Supplementary material for: TSG-6 Produced by hMSCs Delays the Onset of Autoimmune Diabetes by Suppressing Th1 Development and Enhancing Tolerogenicity
Source: PubMed Central journal article supplement — Diabetes. 2013 May 17;62(6):2048–58. doi: 10.2337/db12-0931 (PMC3661629; doi:10.2337/db12-0931), 2013-05-17

## SUPPLEMENTARY DATA

**Supplementary Table 1.** Engraftment of human MSCs in vivo. Tissue distribution of Scr siRNA or TSG-6 siRNA transfected hMSCs ( $1 \times 10^6$  cells) at 24 h after intravenous administration by human GAPDH real time RT-PCR. Most of infused cells were trapped in the lung. A small number of human cells homed in the spleen after IV infusion at day 1, however these cells disappeared after 2 days. There was no difference in cell survival of siRNA transfected hMSCs in vivo following injection.

|          | Scr siRNA transfected hMSCs (n=3) | TSG-6 siRNA transfected hMSCs (n=3) |
|----------|-----------------------------------|-------------------------------------|
| Lung     | 82,616 $\pm$ 7,078                | 76431 $\pm$ 13153.3 <sup>†</sup>    |
| Spleen   | 165.4 $\pm$ 39.4                  | 101.0 $\pm$ 61 <sup>†</sup>         |
| Pancreas | N.D. <sup>‡</sup>                 | N.D.                                |
| PLNs     | N.D.                              | N.D.                                |

<sup>†</sup> Values are mean  $\pm$  S.D. Data not significant by T-Test.

<sup>‡</sup>N.D.-not detected.

**Supplementary Table 2.** TSG-6 inhibits the expression of co-stimulatory molecules on CD11c+ APCs. (a) Control-BM-APCs or (b) TSG-6-BM-APCs were generated in vitro and stimulated with LPS (50ng/ml) in the presence of different concentrations of TSG-6. FACS analysis of APCs generated utilizing antibodies against mouse CD11c, CD80 and CD86. FACS analysis of co-stimulatory molecules expressed in BM-APCs 18 h after LPS activation.

a.

|                 | CD86+ (%) | CD80+ (%) |
|-----------------|-----------|-----------|
| Control         | 79.45     | 85.67     |
| 200 ng/ml TSG-6 | 74.54     | 84.76     |
| 400 ng/ml TSG-6 | 72.29     | 81.61     |

b.

|                                 | CD86+ (%) | CD80+ (%) |
|---------------------------------|-----------|-----------|
| Control-BM-APCs                 | 84.12     | 84.23     |
| TSG-6-BM-APCs (40 ng/ml TSG-6)  | 71.58     | 80.91     |
| TSG-6-BM-APCs (400 ng/ml TSG-6) | 67.12     | 80.21     |

SUPPLEMENTARY DATA

**Supplementary Figure 1.** The efficacy of the siRNA on the expression of TSG-6 *in vitro* and *in vivo*. (a) Real-time RT-PCR assays of hMSCs transfected with Scr or TSG-6 siRNA at 24 h and (b) *in vivo* at 24 h after intravenous administration (n=3). Value are means  $\pm$  S.D. \*\*p<0.001 by two-tailed Student's t-test.

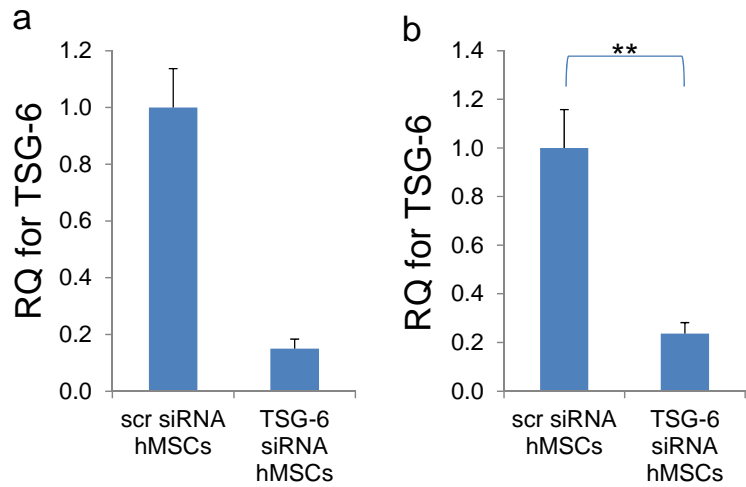

**Supplementary Figure 2.** hMSCs suppressed Th1 cytokine expression in part by secreting TSG-6 *in vitro*. Th1 expression after 72h (a) and 24 h (b) from splenocyte cultures ( $1.0 \times 10^6$ /ml) in the presence of TSG-6 or different ratios of hMSC transfected with Scr or TSG-6 siRNA (hMSCs: splenocytes=1: 10 to 1:20).

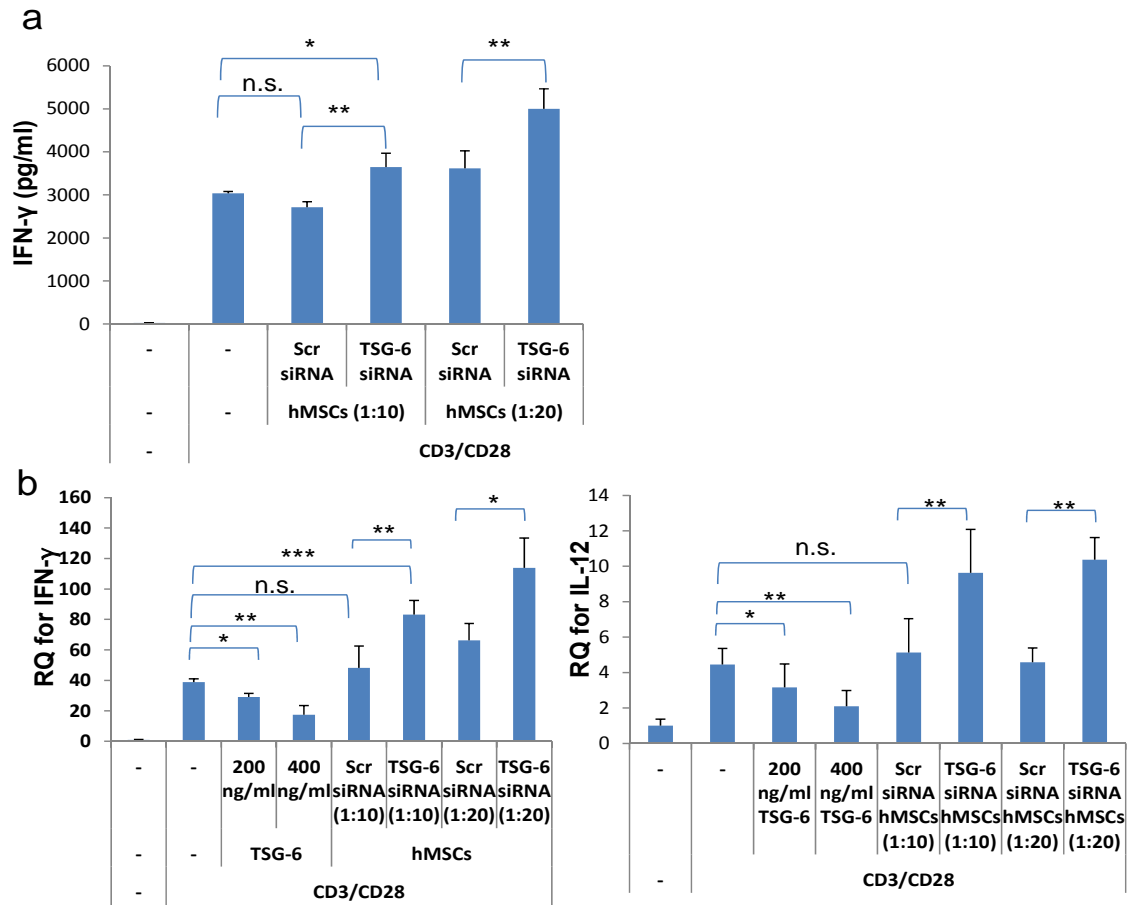

SUPPLEMENTARY DATA

**Supplementary Figure 3.** TSG-6 inhibition of T cell activation and proliferation is not due to cell death. FACS analysis utilizing Annexin-V and 7-Aminoactinomycin (7-AAD) after 8 wk old female NOD splenocytes ( $2.5 \times 10^6/\text{ml}$ ) were activated in a 96-well plate coated with anti-CD3 in the presence of different concentrations of rhTSG-6 for 72 h. Values are means  $\pm$  S.D.

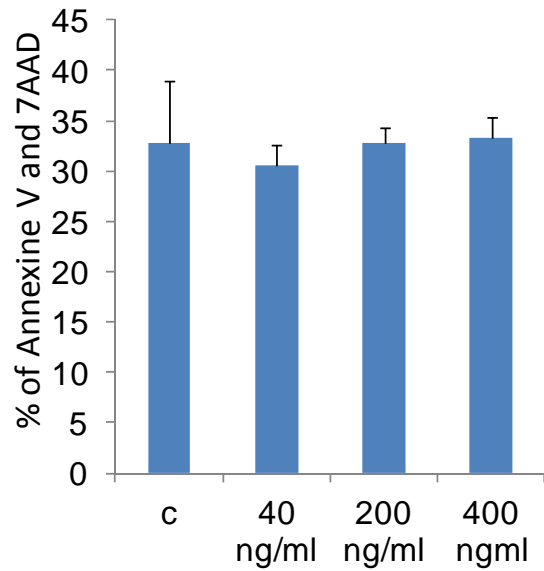

**Supplementary Figure 4.** TSG-6 Inhibited Nuclear Translocation of NF- $\kappa$ B in APCs. Murine bone marrow derived APCs were incubated with LPS (50 ng/ml) and with or without TSG-6 for 15 min. Representative micrographs of immunocytochemistry are shown for cytoplasmic and nuclear distribution on NF- $\kappa$ B. (b) NF- $\kappa$ B translocation 15 min after activation. Ten arbitrary chosen high-power fields (20x magnification) were captured at random and quantified. Values are means  $\pm$  S.D. ( $n=10$ ,  $*p<0.05$  by one-way ANOVA).

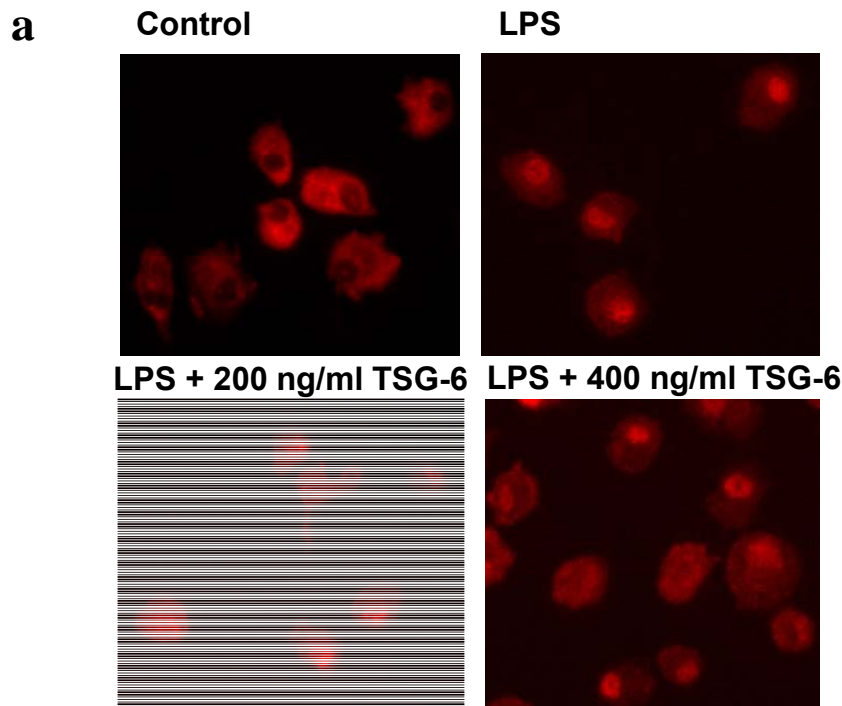

**b**

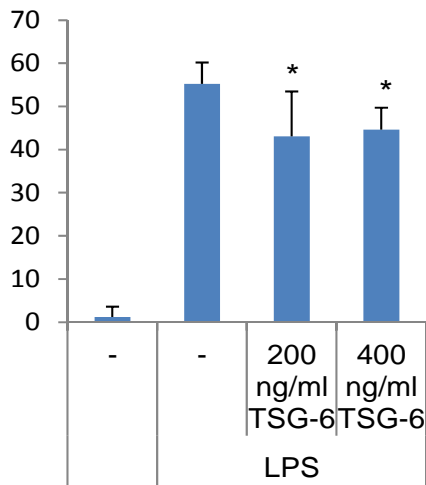

**Supplementary Figure 5.** TSG-6 suppressed antigen presenting cell activation *in vitro*. Splenocytes were activated with LPS (100ng/ml) *in vitro* in the presence of TSG-6. (a) MTT assay and (b) IFN-γ expression 72 h after activation. Values are means ± S.D. n=3, \*p<0.05 by two-tailed Student's t-test.

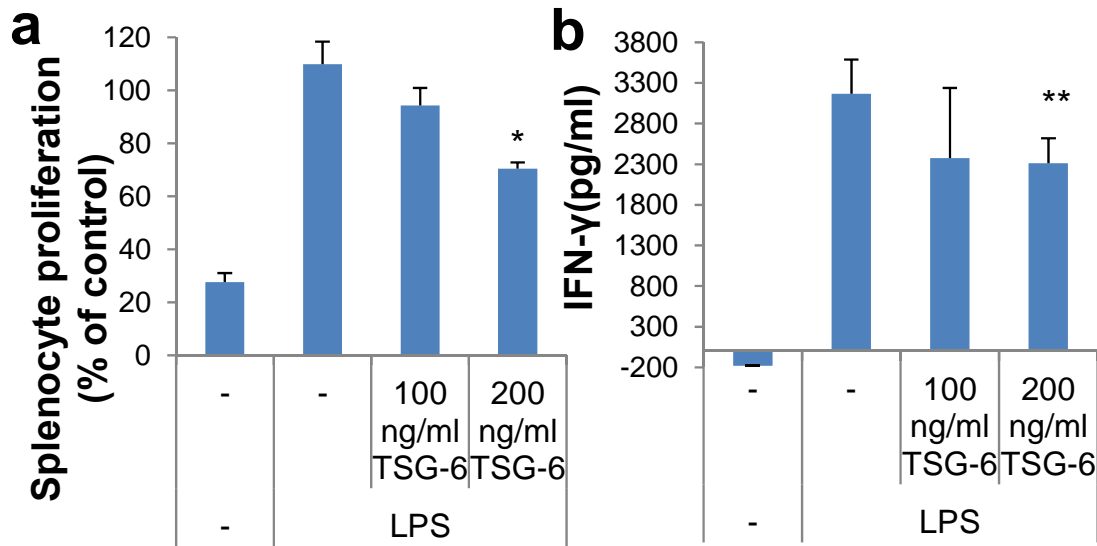

## SUPPLEMENTARY DATA

**Supplementary Figure 6.** Schematic diagram. TSG-6, secreted by hMSCs, inhibits Th1 polarization by inhibiting both APC and T cell activation and is capable of driving the differentiation of APCs towards a tolerogenic phenotype, thereby generating regulatory T cells both *in vitro* and *in vivo*.

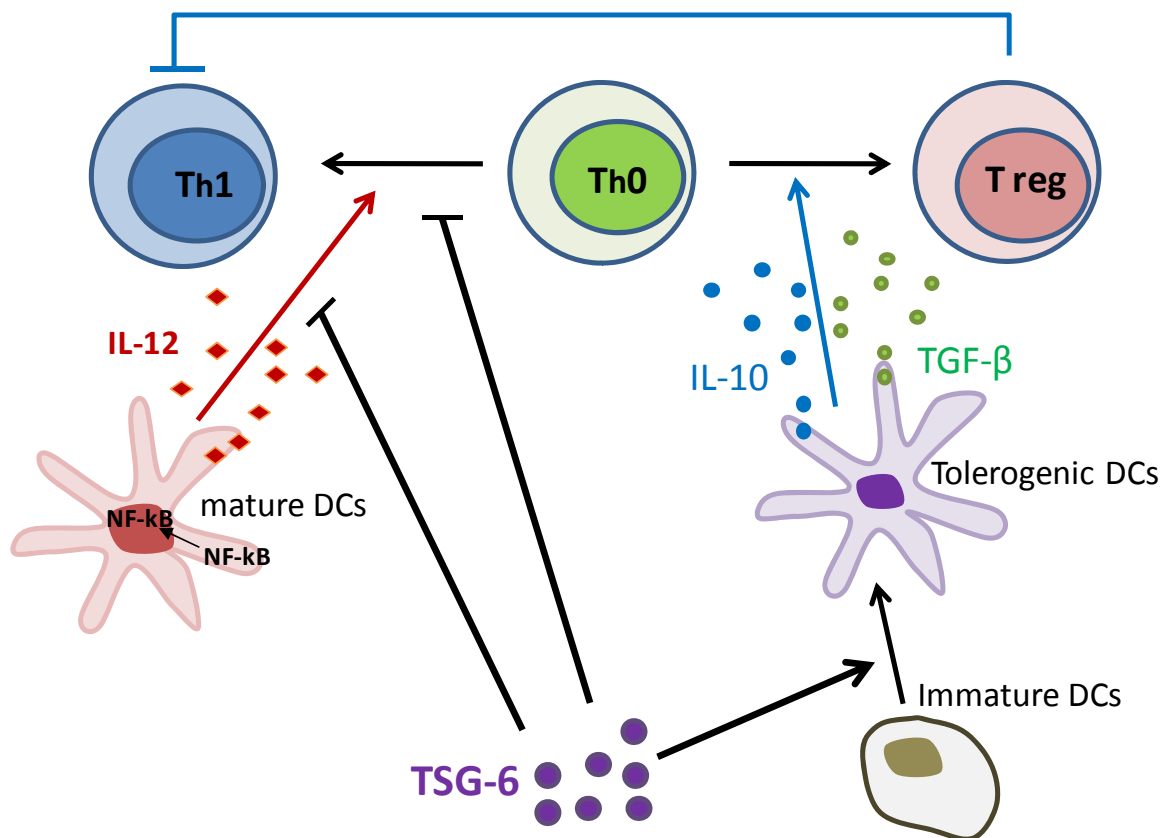

Supplement: supp_db12-0931_DB120931SupplementaryData.pdf [file supp_db12-0931_DB120931SupplementaryData.pdf]
